# Supplementary material
Source: publisher site journal article supplement (https://www.spandidos-publications.com/6403/downloadSupplementary)

Figure S1. Effect of different concentrations of PQ and time on cell viability of HPMECs. (A) Cell viability was assessed after treating cells with 200, 400, 800, 1,200, 1,600 and 2,000  $\mu\text{M}$  for 24 h. (B) Cell viability was assessed after treatment of cells with 200, 400, 800, 1,200, 1,600 and 2,000  $\mu\text{M}$  for 48 h. (C) Cell viability was assessed after treating cells with 10, 50, 100, 200, 300 and 600  $\mu\text{M}$  for 72 h. The horizontal coordinate is concentration and the vertical coordinate is cell viability. Data are expressed as the mean  $\pm$  SEM of three independent experiments. Compared with control (0  $\mu\text{M}$  PQ), \* $P < 0.05$ , \*\* $P < 0.01$  and \*\*\* $P < 0.001$ . PQ, paraquat; ns, not significant.

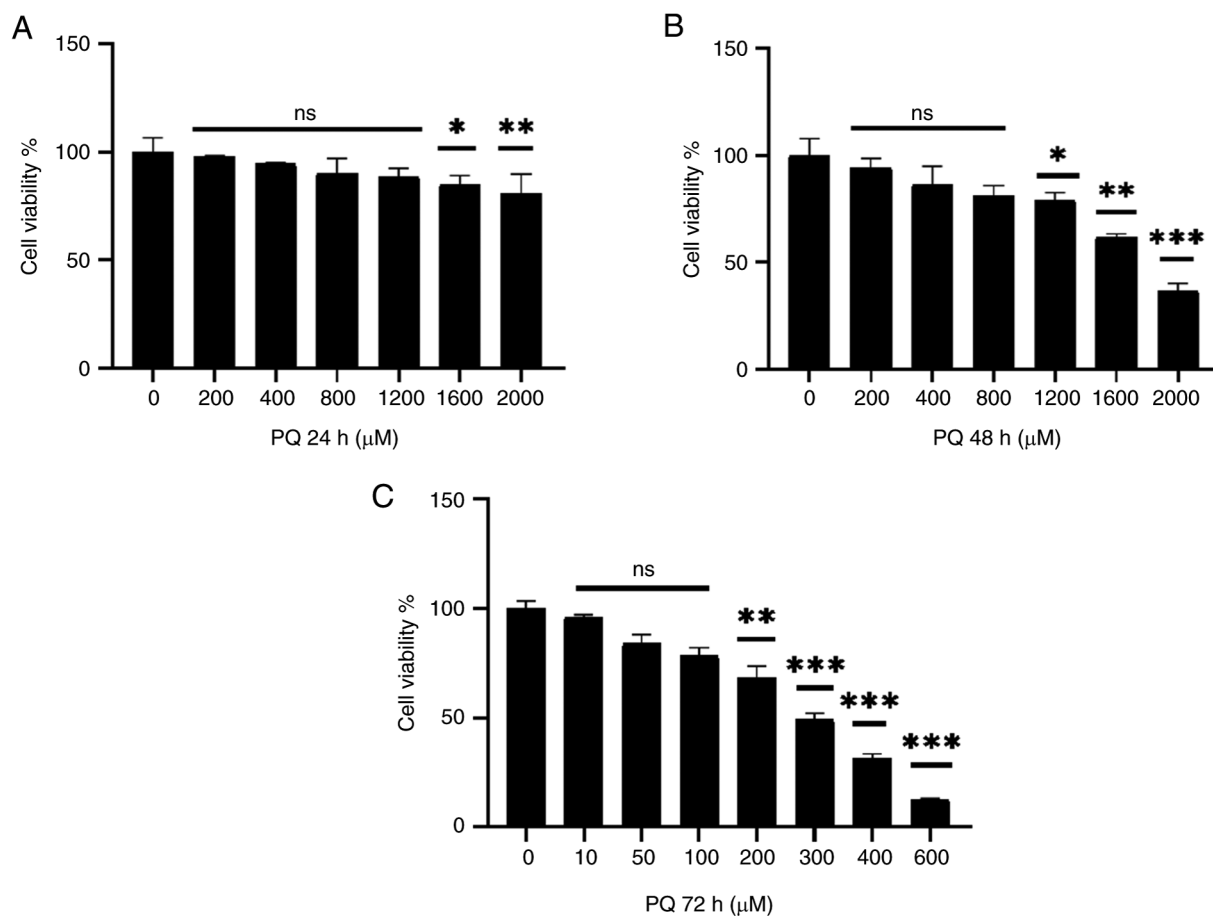

Supplement: Supplementary file 1 [file downloadSupplementary]
